# Supplementary material for: Human senescent fibroblasts trigger progressive lung fibrosis in mice
Source: Aging (Albany NY). 2023 Jul 1;15(14):6641–57. doi: 10.18632/aging.204825 (PMC10415539; doi:10.18632/aging.204825)
Supplement: Supplementary Figure 1 [file aging-15-204825-s002.pdf]

## SUPPLEMENTARY FIGURE

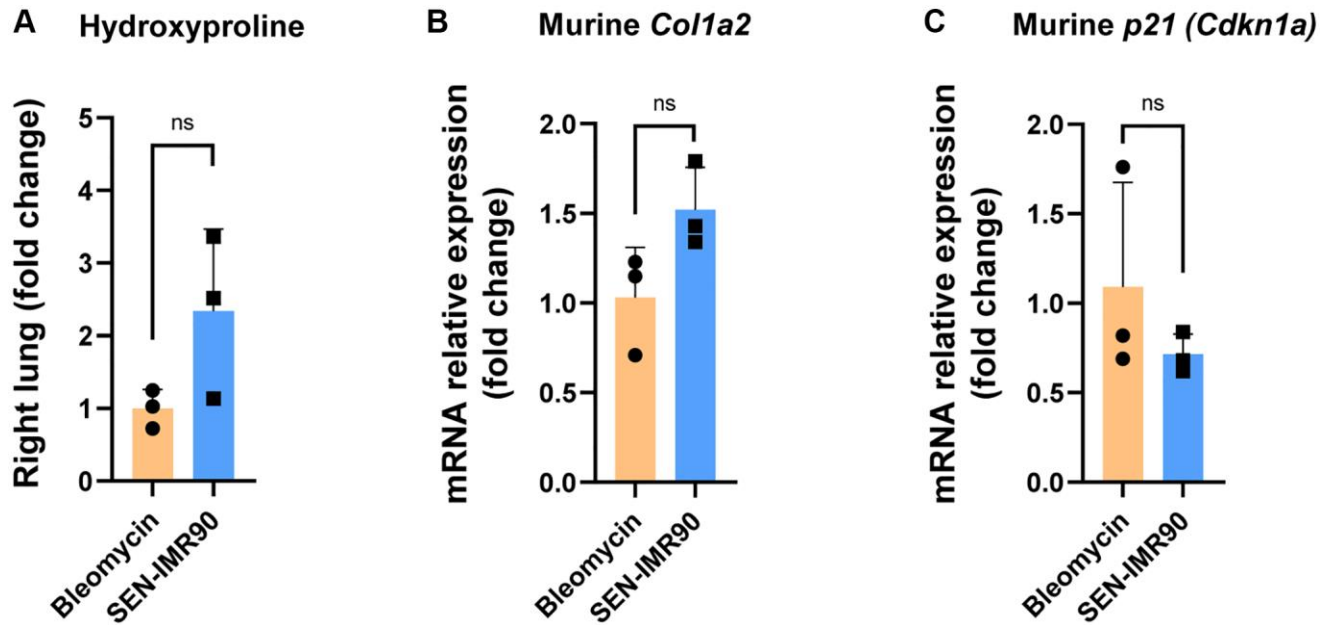

**Supplementary Figure 1. Lung fibrosis induced by senescent human lung fibroblasts recapitulates other features of the bleomycin-induced lung fibrosis model.** (A) Lung fibrosis was ascertained by hydroxyproline assay, and (B) mRNA expression of *Col1a2* and (C) *Cdkn1a/p21<sup>Cip1/Waf1</sup>* in lungs of SEN-IMR90 injected mice compared to bleomycin treated mice, 2 months after treatment. For each experimental group,  $n = 3$ . The group labelled SEN-IMR90 is the same group labelled SEN-IMR90 (2 months) in Figure 3B, 3C, 3D and the absolute data are the same. Statistical significance was assessed by two-tailed Student's  $t$ -test. Abbreviation: NS: not significant. For further explanations, see text.
